# Supplementary material for: Synthesis and evaluation of 2-ethynyl-adenosine-5′-triphosphate as a chemical reporter for protein AMPylation
Source: Royal Society of Chemistry journal article supplement (doi:10.1039/c5ob01081k), 2015-01-01
Supplement: c5ob01081k1.pdf [file c5ob01081k1.pdf]

Supplementary Information

Synthesis and evaluation of 2-ethynyl-adenosine-5'-triphosphate as a  
chemical reporter for protein AMPylation

Christa Creech, Mukul Kanauja and Corey P. Causey\*

*<sup>a</sup> Department of Chemistry, University of North Florida, 1 UNF Dr., Jacksonville, FL 32224, USA*

|                                                 |                   |
|-------------------------------------------------|-------------------|
| NMR spectra for compounds 1-7                   | (Figures S1-S14)  |
| HPLC trace for purification of compound 7       | (Figure S15)      |
| HRMS spectra for compounds 1-7                  | (Figures S16-S22) |
| MALDI spectra for unmodified and modified Cdc42 | (Figure S23)      |

---

\* Corresponding author. Tel.: +1-904-620-2098; fax: +1-904-620-3535; e-mail: corey.causey@unf.edu;

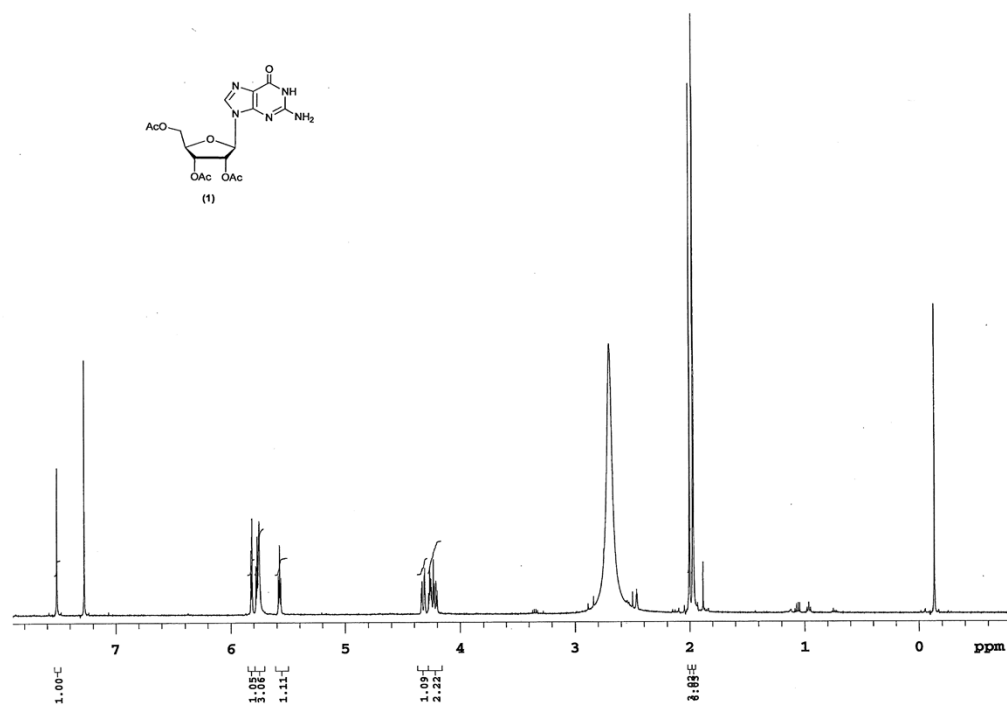

**Fig. S1** <sup>1</sup>H NMR of 2',3',5'-triacetylguanosine (1).

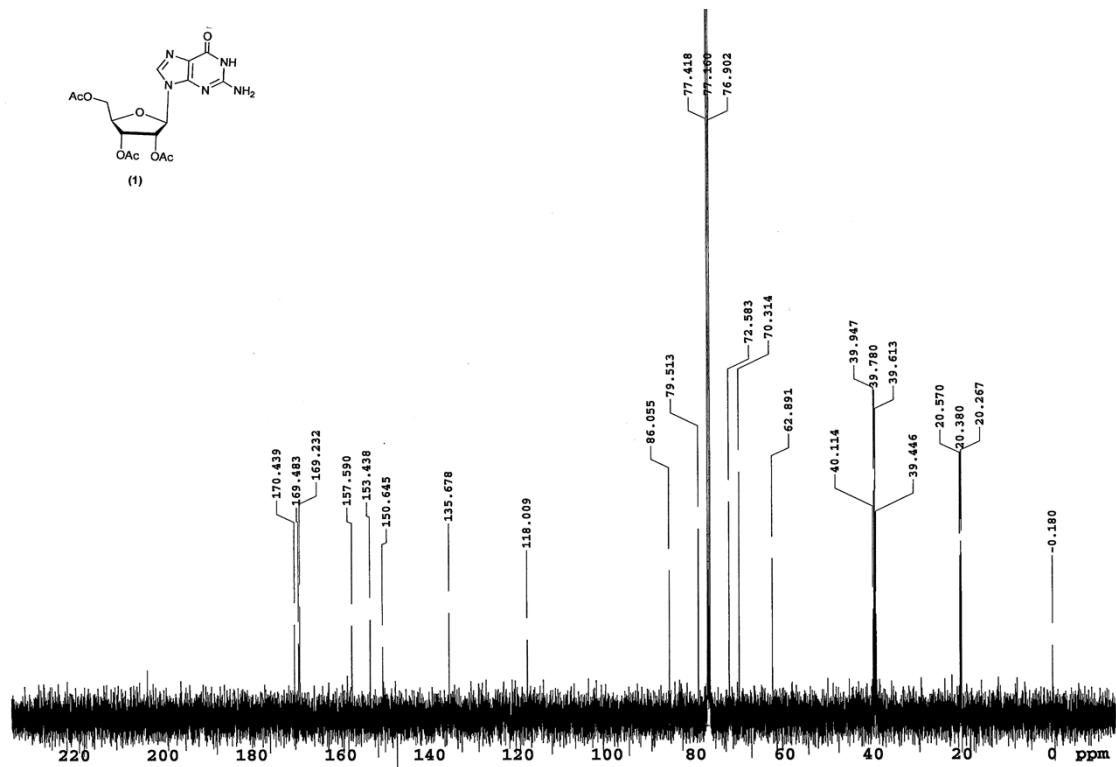

Fig. S2 <sup>13</sup>C NMR of 2',3',5'-tri-O-acetylguanosine (1).

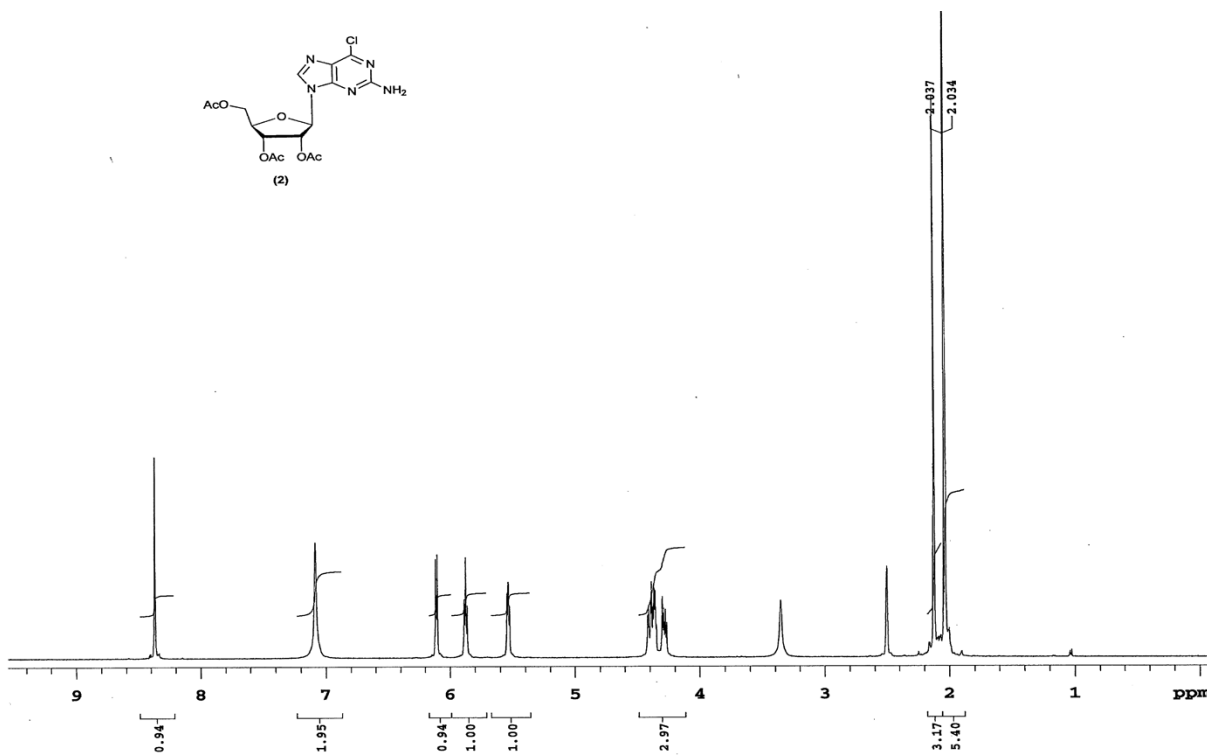

**Fig. S3** <sup>1</sup>H NMR of 2-amino-6-chloro-9-(2,3,5-tri-O-acetyl-β-D-ribofuranosyl)purine (2).

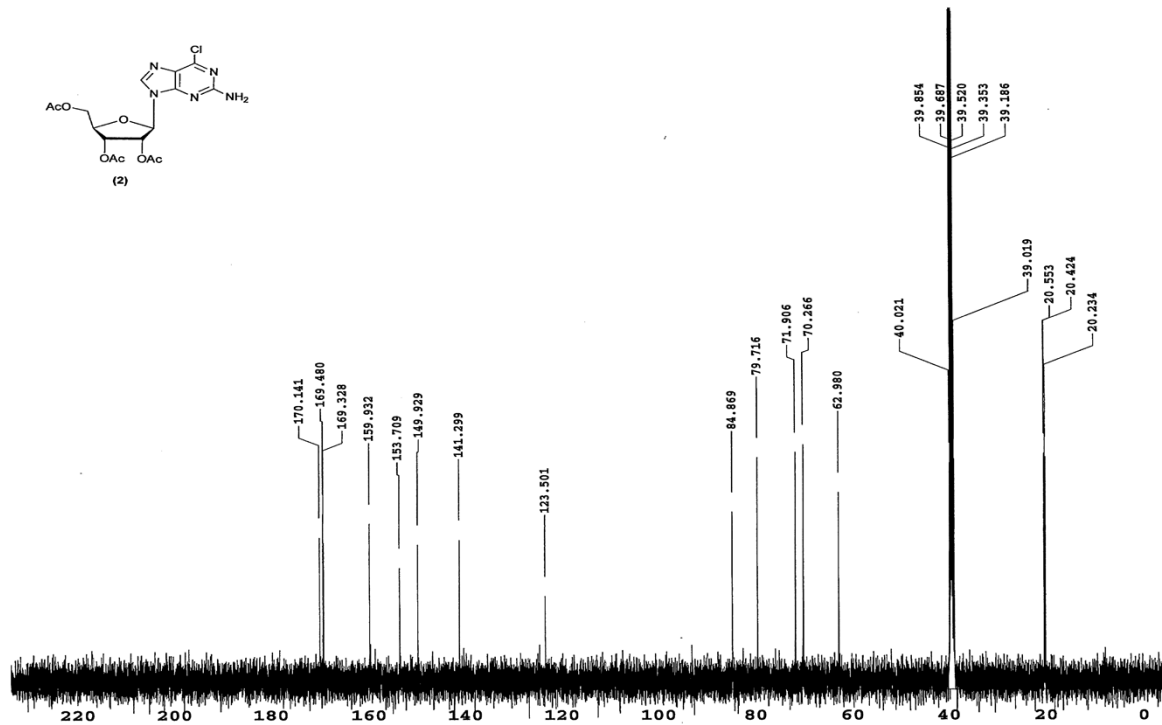

**Figure S4.** <sup>13</sup>C NMR of 2-amino-6-chloro-9-(2,3,5-tri-O-acetyl-β-D-ribofuranosyl)purine (2).

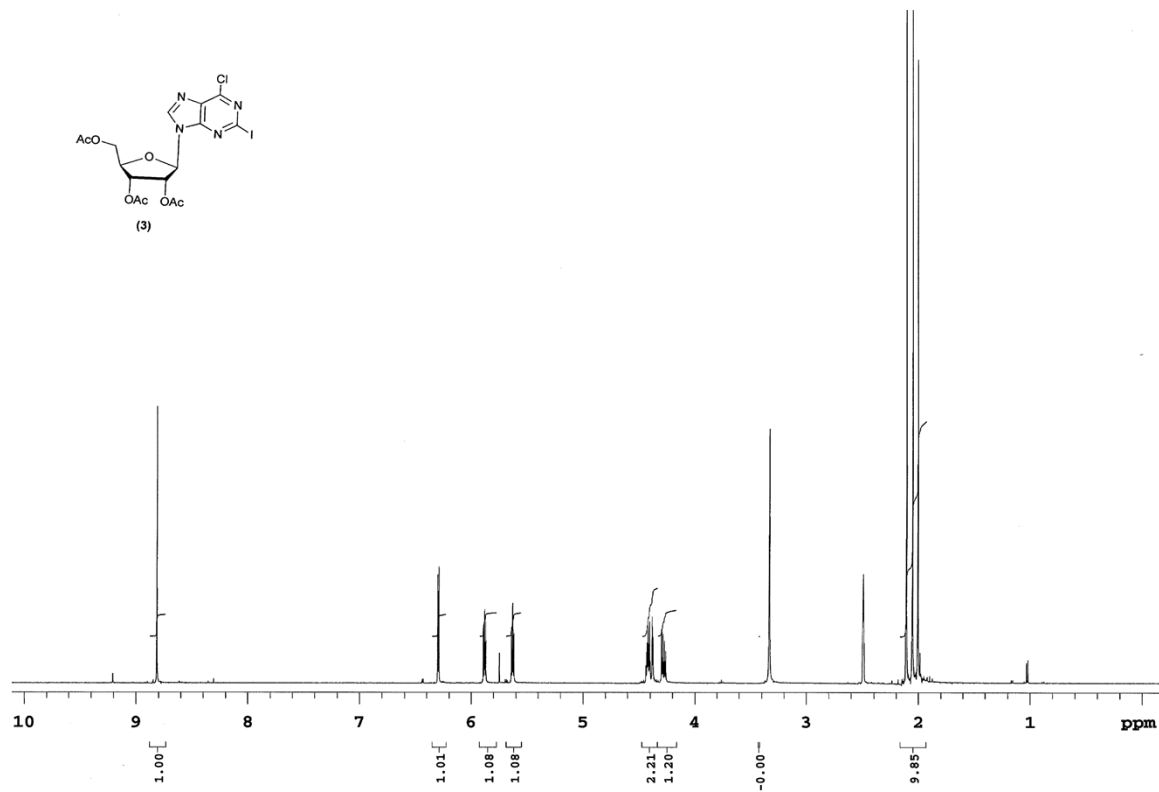

**Fig. S5** <sup>1</sup>H NMR of 6-chloro-2-iodo-9-(2,3,5-tri-O-acetyl-β-D-ribofuranosyl)-9H-purine (**3**).

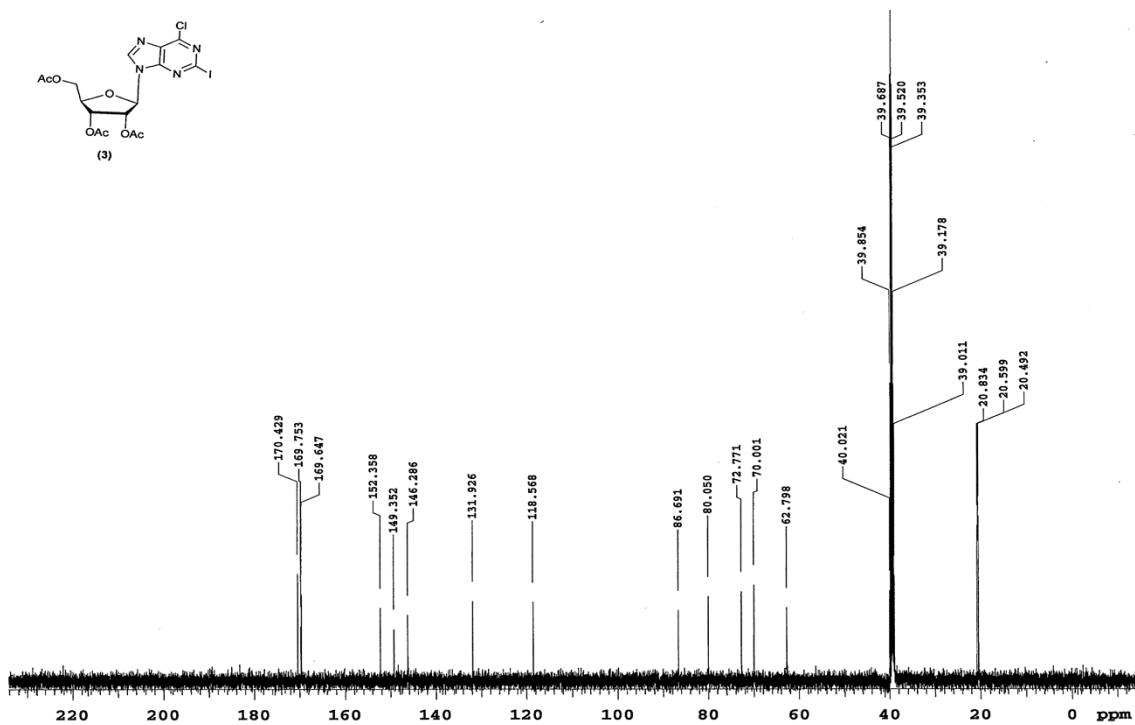

**Fig. S6** <sup>13</sup>C NMR of 6-chloro-2-iodo-9-(2,3,5-tri-O-acetyl-β-D-ribofuranosyl)-9H-purine (**3**).

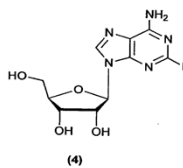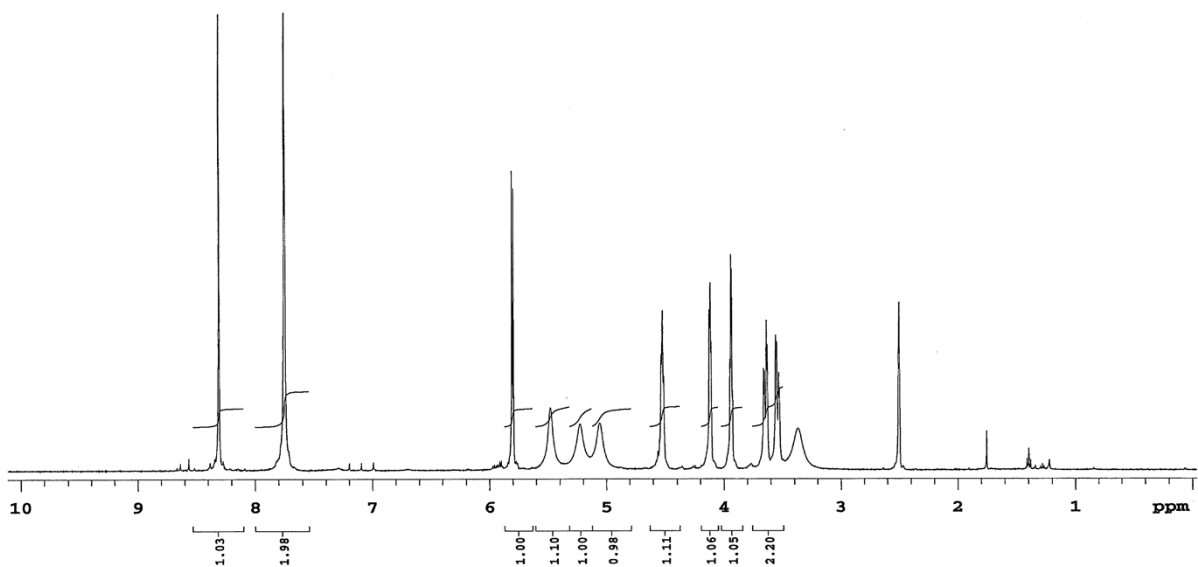

Fig. S7 <sup>1</sup>H NMR of 2-iodoadenosine (4).



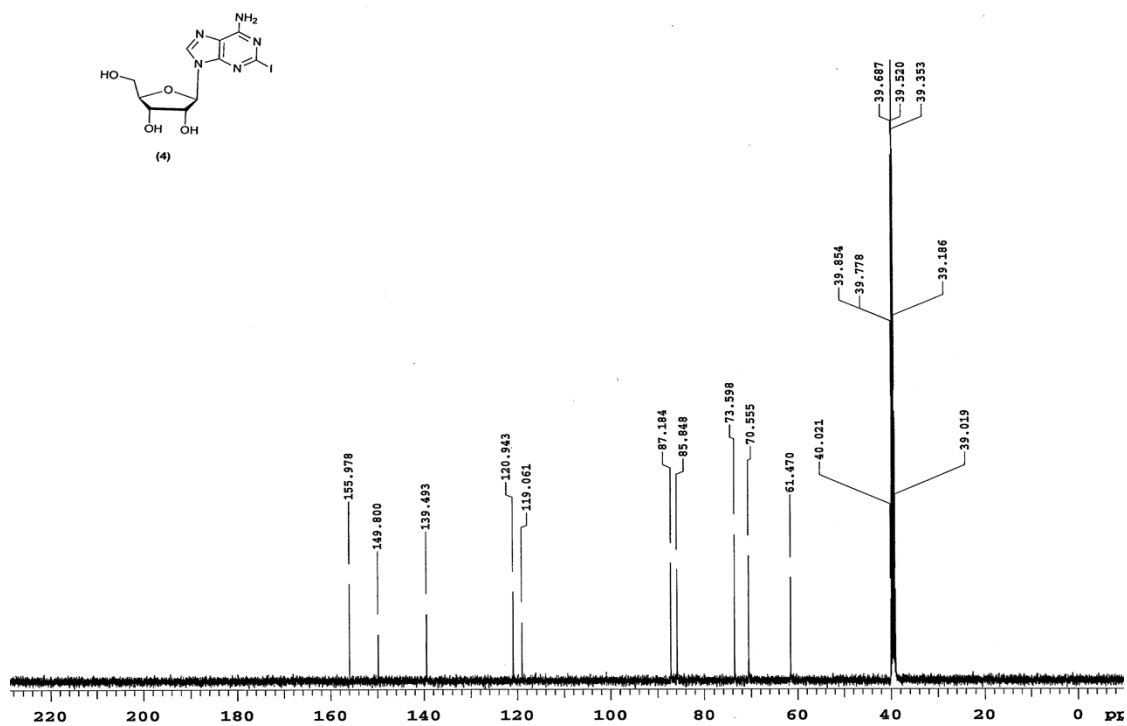

**Fig. S8** <sup>13</sup>C NMR of 2-iodoadenosine (4).

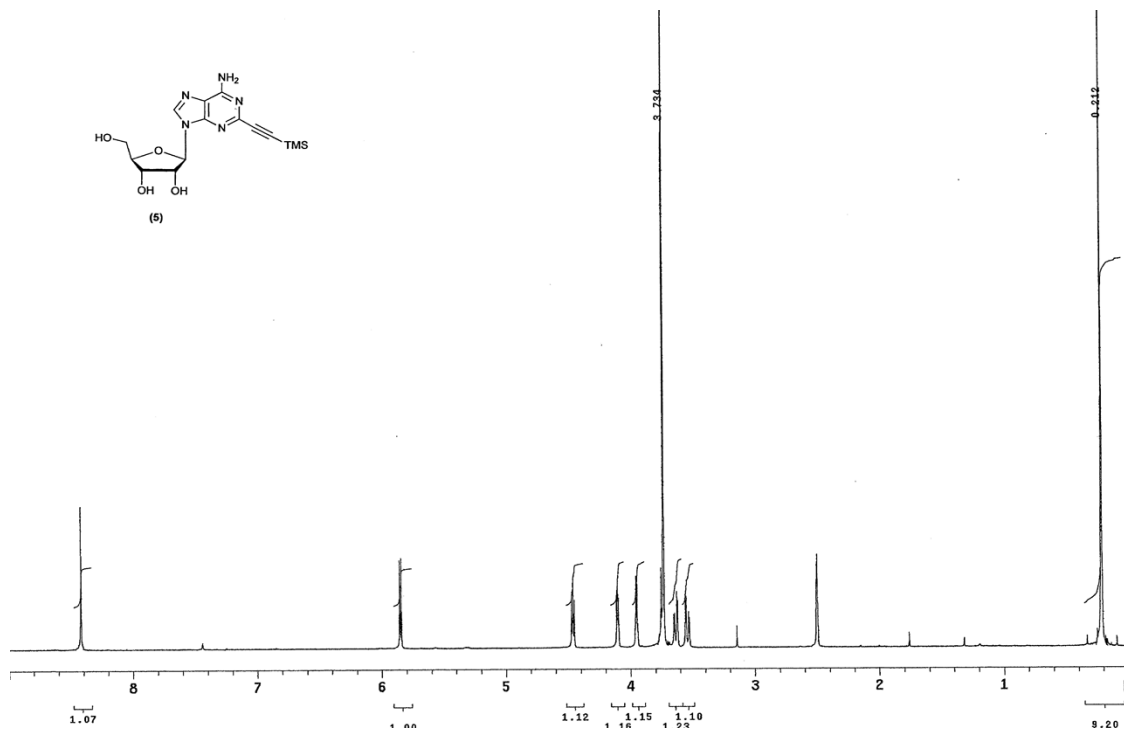

**Fig. S9** <sup>1</sup>H NMR of 2-[2-(trimethylsilyl)ethynyl]-adenosine (5).

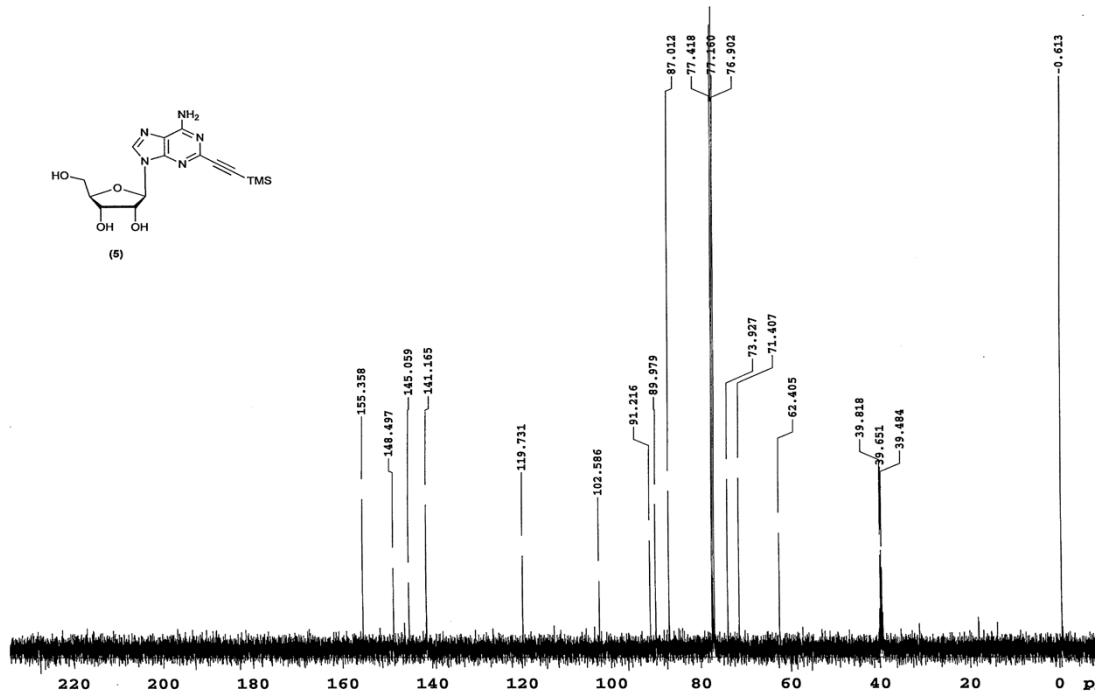

Fig. S10  $^{13}\text{C}$  NMR of 2-[2-(trimethylsilyl)ethynyl]-adenosine (5).

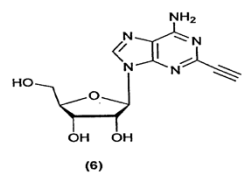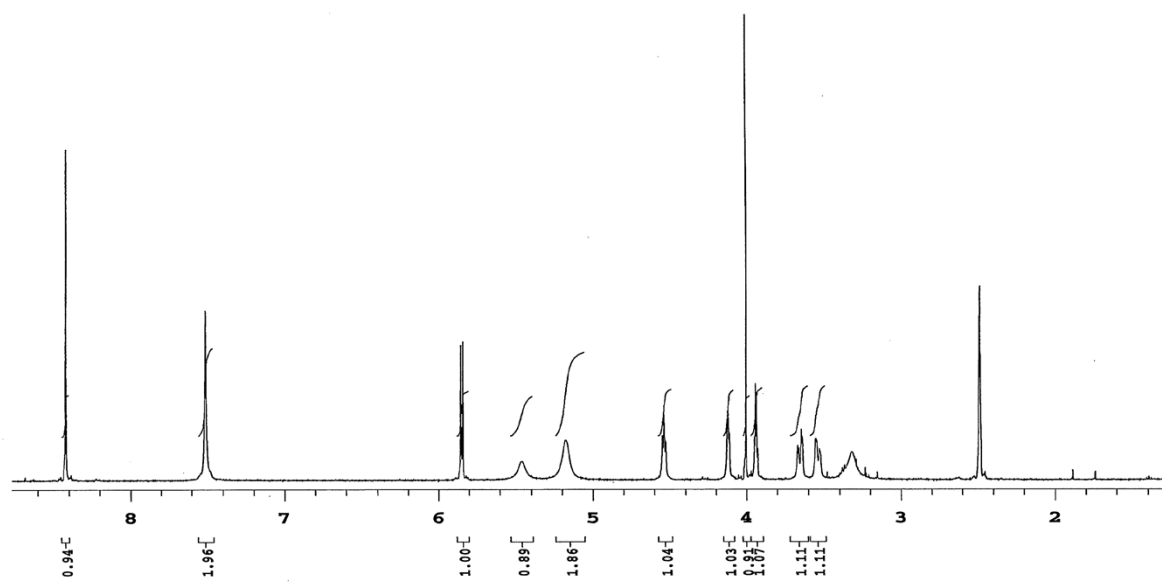

**Fig. S11**  $^1\text{H}$  NMR of 2-ethynyladenosine (6).

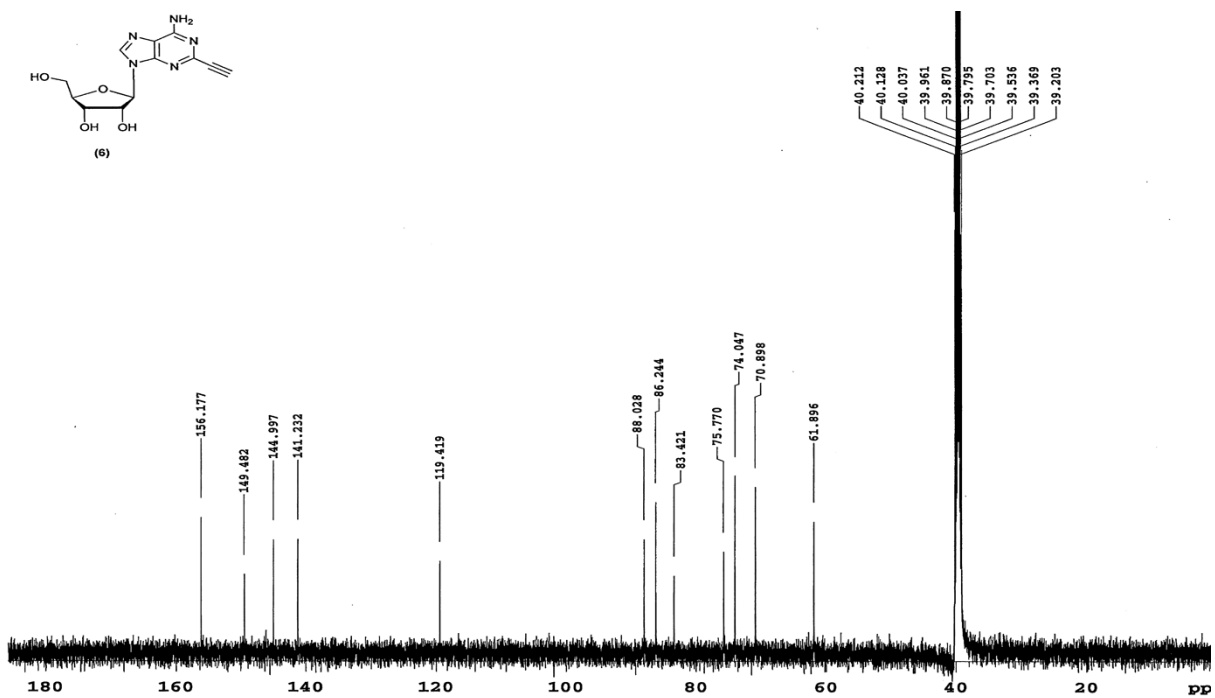

Fig. S12 <sup>13</sup>C NMR of 2-ethynyladenosine (6).

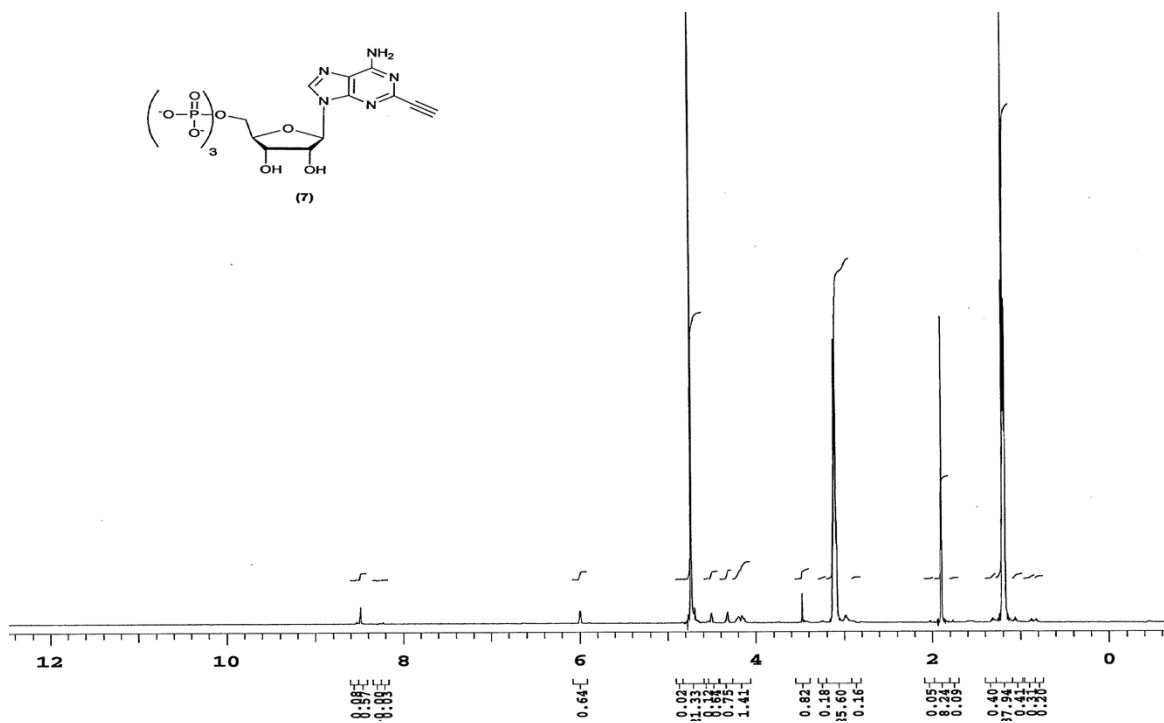

**Fig. S13**  $^1\text{H}$  NMR of 2-ethynyl-adenosine-5'-triphosphate (2eATP)(7) in triethylammoniumacetate buffered  $\text{D}_2\text{O}$ .

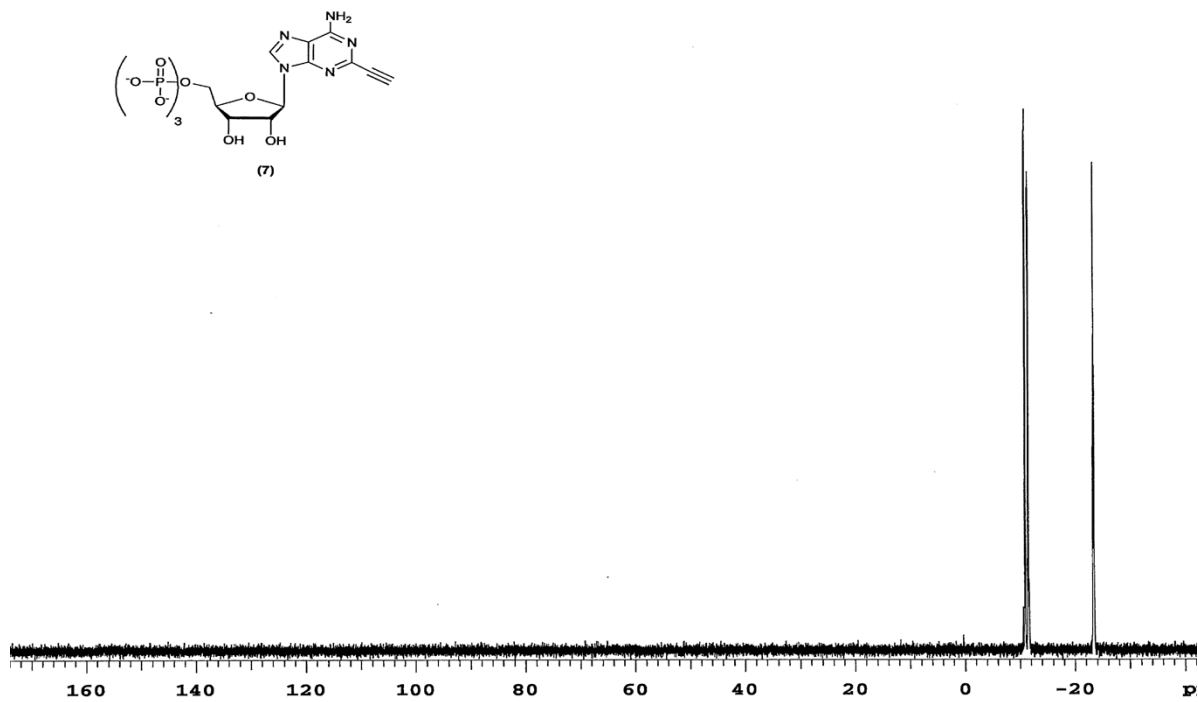

**Fig. S14**  $^{31}\text{P}$  NMR of 2-ethynyl-adenosine-5'-triphosphate (2eATP)(7).

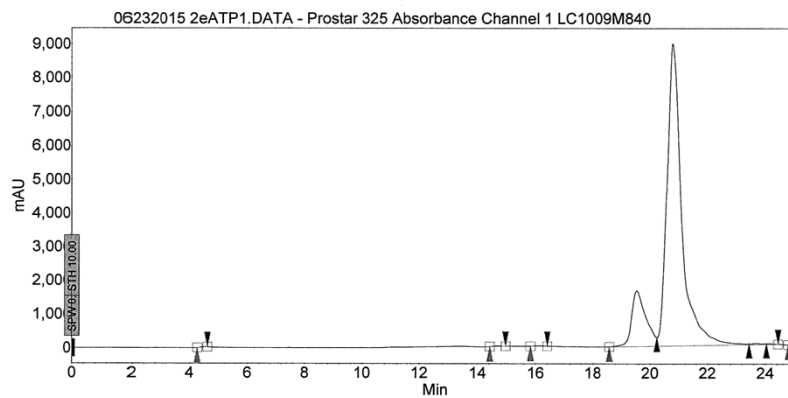

**Fig. S15** HPLC chromatogram of 2eATP reaction separation.

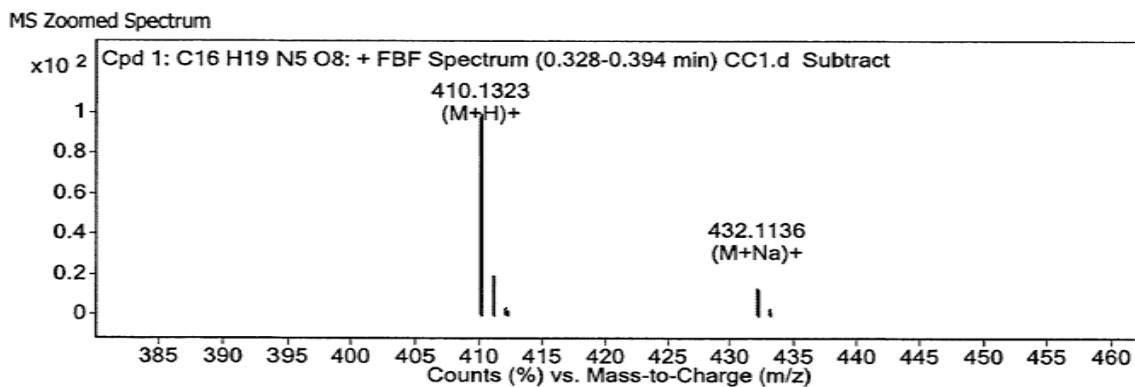

**Fig. S16** Mass spectrum of compound 1 (calculated mass: 410.1312).

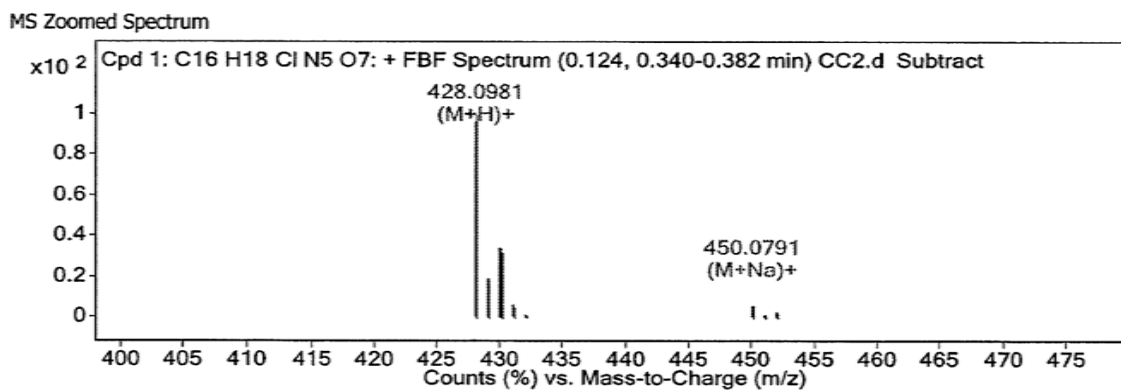

**Fig. S17** Mass spectrum of compound 2 (calculated mass: 428.0973).

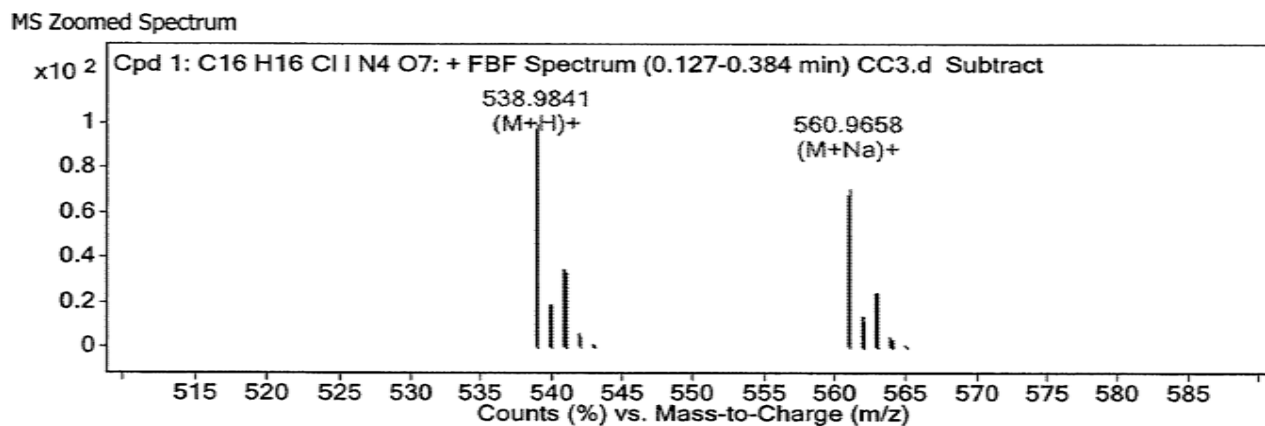

**Fig. S18** Mass spectrum of compound 3 (calculated mass: 538.9831).



MS Zoomed Spectrum

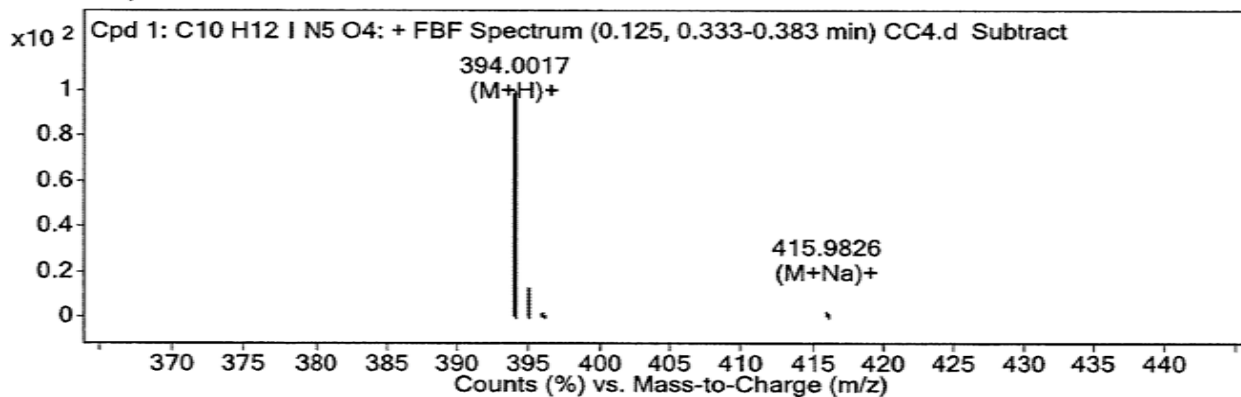

Fig. S19 Mass spectrum of compound 4 (calculated mass: 394.0012).

MS Zoomed Spectrum

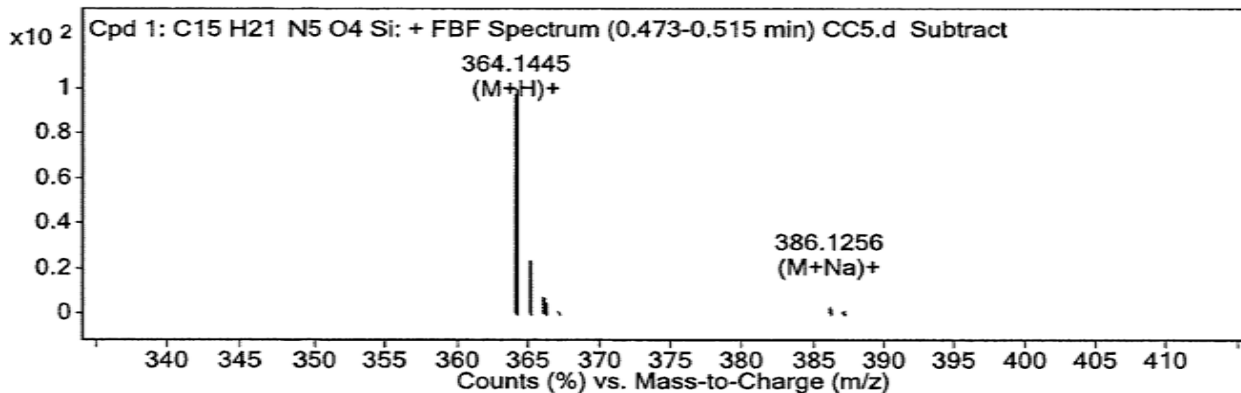

Fig. S20 Mass spectrum of compound 5 (calculated mass: 364.1441).

MS Zoomed Spectrum

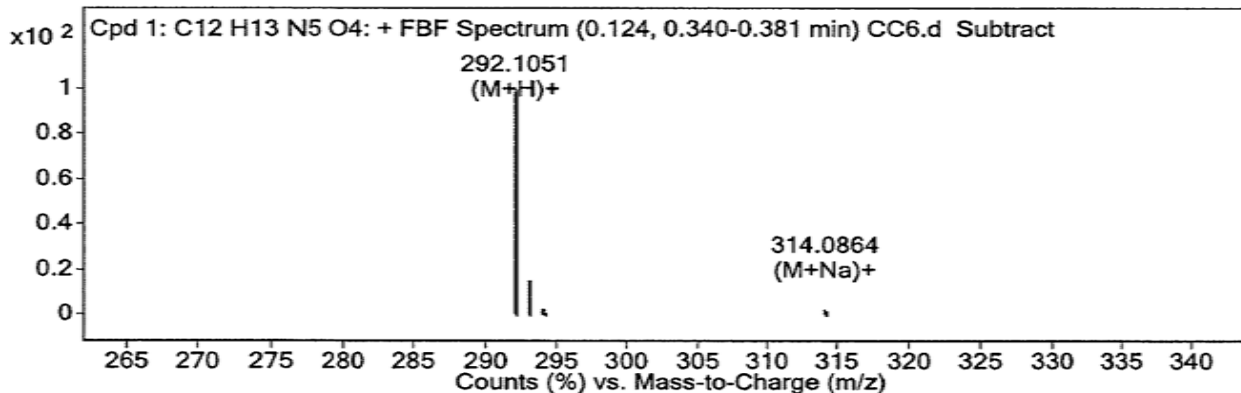

Fig. S21 Mass spectrum of compound 6 (calculated mass: 292.1046).

MS Zoomed Spectrum

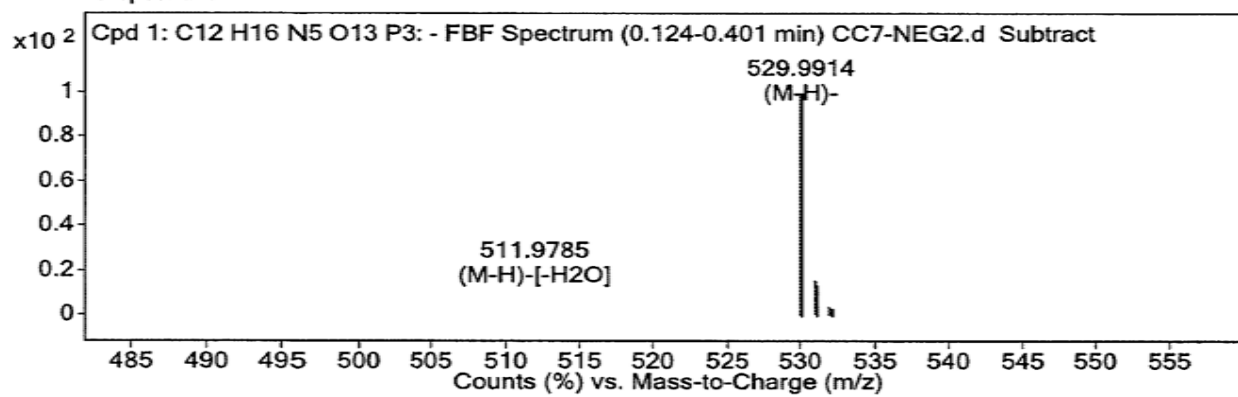

**Fig. S22** Mass spectrum of compound 7 (calculated mass: 529.9879).

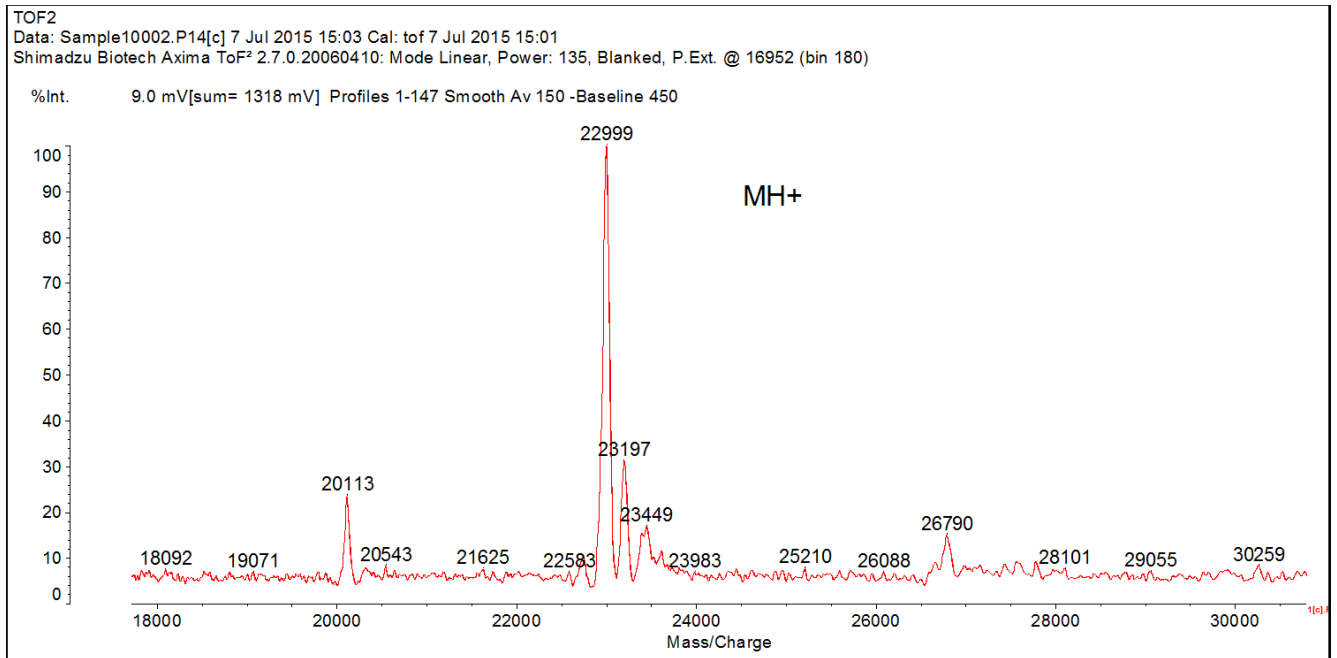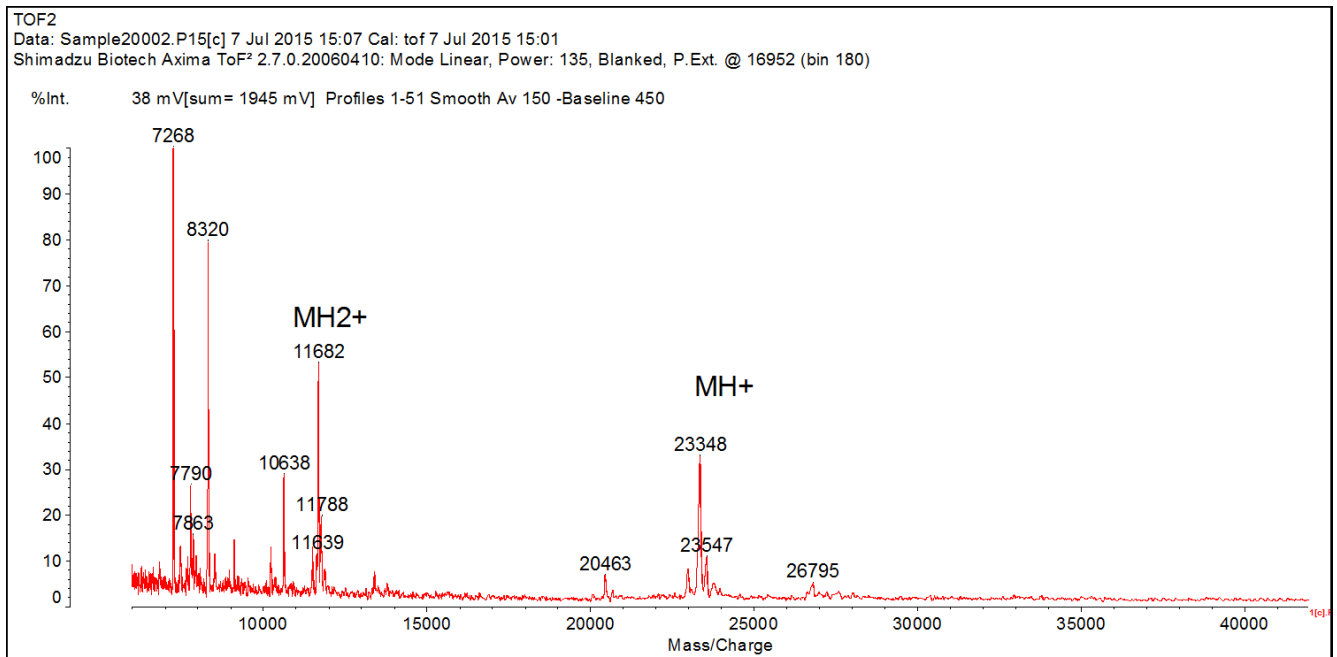

**Fig. S23** The modification of Cdc42 with 2eAMP was confirmed by MALDI mass spec. The top spectrum is Cdc42 that was incubated with VopS in the absence of 2eATP. The bottom spectrum shows Cdc42 that was incubated with VopS in the presence of 2eATP. The expected mass difference is 353 Da for the addition of the 2eAMP group.
